# Supplementary material
Source: Springer Nature journal article supplement (https://www.springermedizin.de/resource/supplementary/12946_2003_14_MOESM3_ESM.pdf/9555478)

**A**

| E2   | - | + | + | + | +  |
|------|---|---|---|---|----|
| TCDD | - | - | 1 | 5 | 10 |

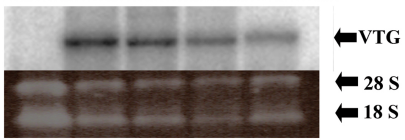**B**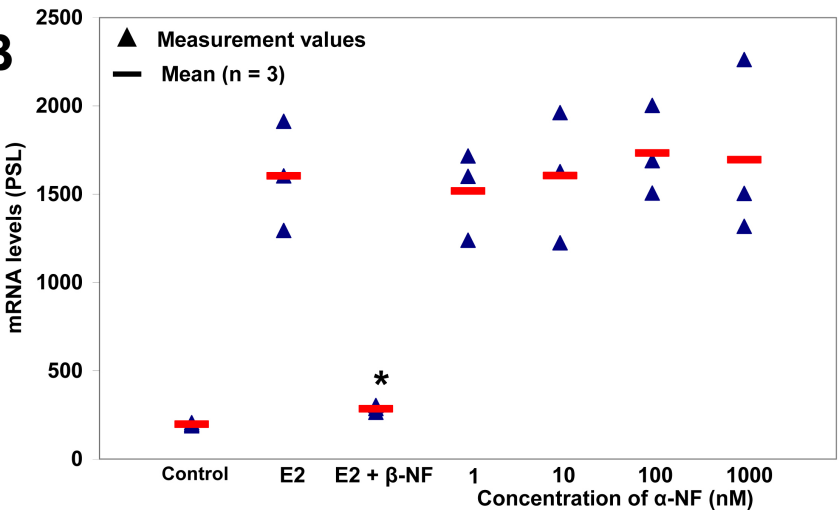

Supplement: MOESM3 [file 9555478]
